# Supplementary material for: Electromagnetic Versus Blind Guidance of a Postpyloric Feeding Tube in Critically Ill Children
Source: Oxford University Press journal article supplement (doi:10.1542/peds.2019-3773), 2020-09-29
Supplement: peds_20193773supplementarydata.pdf [file peds_20193773supplementarydata.pdf]

Supplemental Information

Patient label

: Data Collection Sheet:

Postpyloric feeding tube Project

Date:

Location: PICU/ PCCU/ IMC/ Floor

Patient No.:

1) Initial patient or Repeat patient?

2) Number of attempts before confirmed successful placement:

3) Number of X-rays done for each placement:

4) Successful placement?

5) Type of stylet Used:

6) Time in minutes from Start to End:

7) Time feeding started:

8) Time in minutes from Start to feed initiation:

9) Number of persons attempted the placement:

10) Does child have internal cardiac pacemaker or defibrillator or pacing wires (internal/ external)?

|                            |      |      |  |
|----------------------------|------|------|--|
|                            | Date | Time |  |
| Start Time*                |      |      |  |
| End Time*                  |      |      |  |
| Time of X-ray confirmation |      |      |  |

|        |  |
|--------|--|
| Age    |  |
| Gender |  |
| Weight |  |
| Race   |  |

|                      |  |
|----------------------|--|
| Reason for Adm.      |  |
| PRISM Score          |  |
| Time to Full Feeds   |  |
| Days (Mech vent)     |  |
| Days (ICU stay)      |  |
| Days (Hospital Stay) |  |

Comment:

**SUPPLEMENTAL FIGURE 4**  
Data collection tool. Adm, admission; CEAS, CORTAK\* 2 Enteral Access System; IMC, intermediate care unit; Mech vent, mechanical ventilation; PCCU, pediatric cardiac care unit.
